# Supplementary material for: Fabrication of hydrophobic NiFe2O4@poly(DVB–LMA) sponge via a Pickering emulsion template method for oil/water separation
Source: Royal Society of Chemistry journal article supplement (doi:10.1039/d0sm01902j), 2021-01-01
Supplement: d0sm01902j1.pdf [file d0sm01902j1.pdf]

# Fabrication of hydrophobic NiFe<sub>2</sub>O<sub>4</sub>@poly(DVB-LMA) sponge via Pickering emulsion template method for oil/water separation

Caimei Zhao<sup>a,b,c,†</sup>, Lei Chen<sup>d,†</sup>, Chuanming Yu<sup>a,\*</sup>, Binghua Hu<sup>a</sup>, Haoxuan Huang<sup>a</sup>, Yongjie Chen<sup>a</sup>, Xin Wang<sup>a</sup>, Yongshi Ye<sup>a</sup>, Xiaohui Zhuang<sup>a</sup>, Yong Li<sup>a,\*</sup>

<sup>a</sup> Faculty of Chemistry and Environmental Science, Guangdong Ocean University, Zhanjiang, PR China, 524088

<sup>b</sup> Key Laboratory for Biobased Materials and Energy of Ministry of Education, College of Materials and Energy, South China Agricultural University, Guangzhou, PR China, 510642

<sup>c</sup> Guangdong Laboratory for Lingnan Modern Agricultural Science and Technology, Guangzhou, PR China, 510642

<sup>d</sup> School of Civil Engineering, Guangdong Ocean University Cunjin College, Zhanjiang, PR China, 524094

† These authors contributed equally to this work.

\* Correspondence: yucmingdou@163.com (C.Y.); yongli6808@126.com (Y.L.);

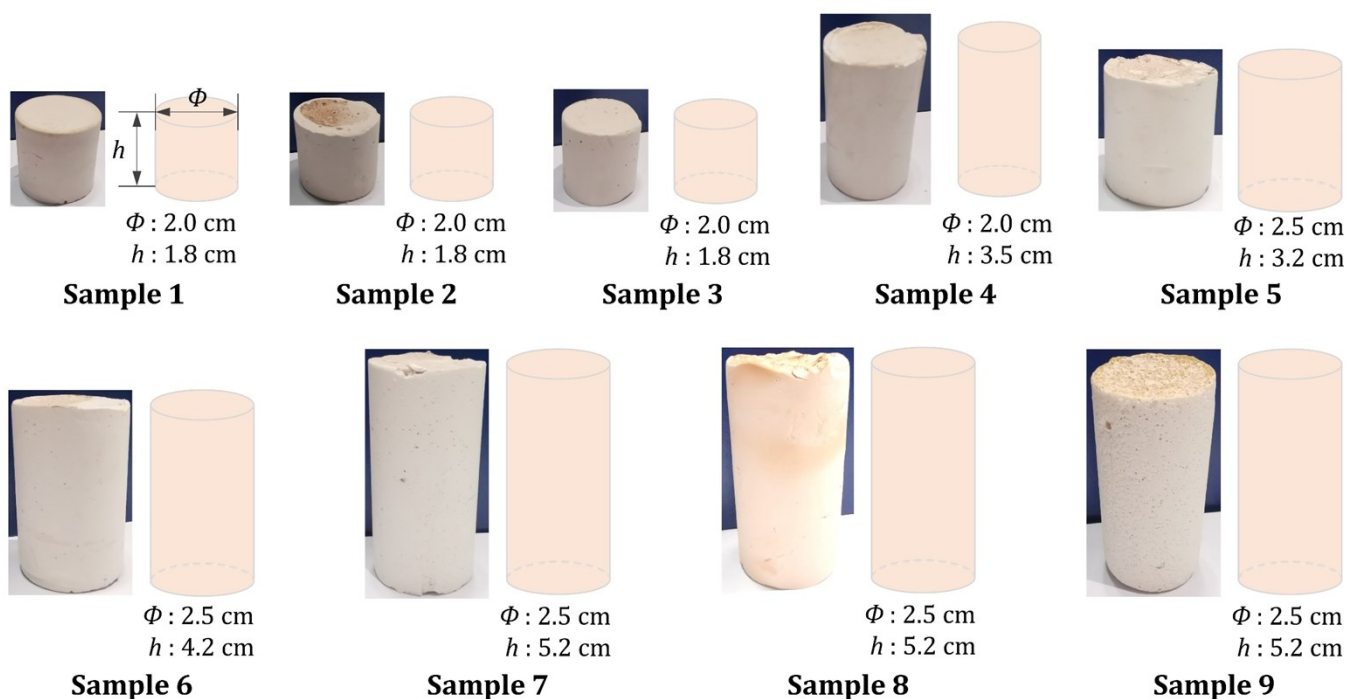

Figure S1. Digital photos of samples 1~9.

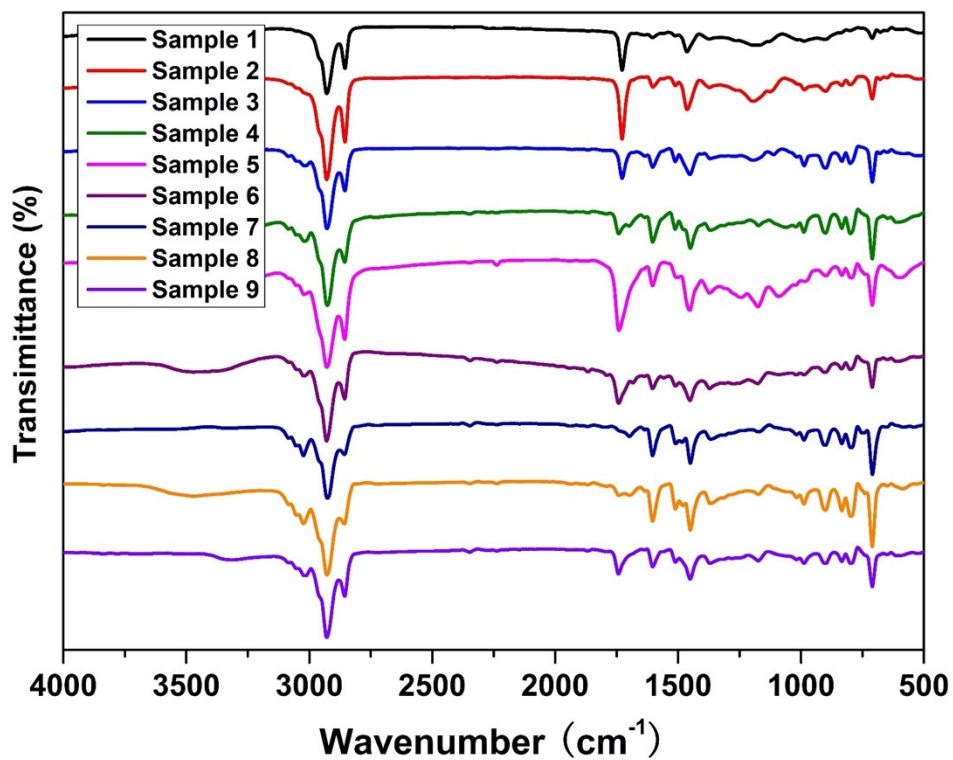

Figure S2. FTIR spectra for samples 1~9.

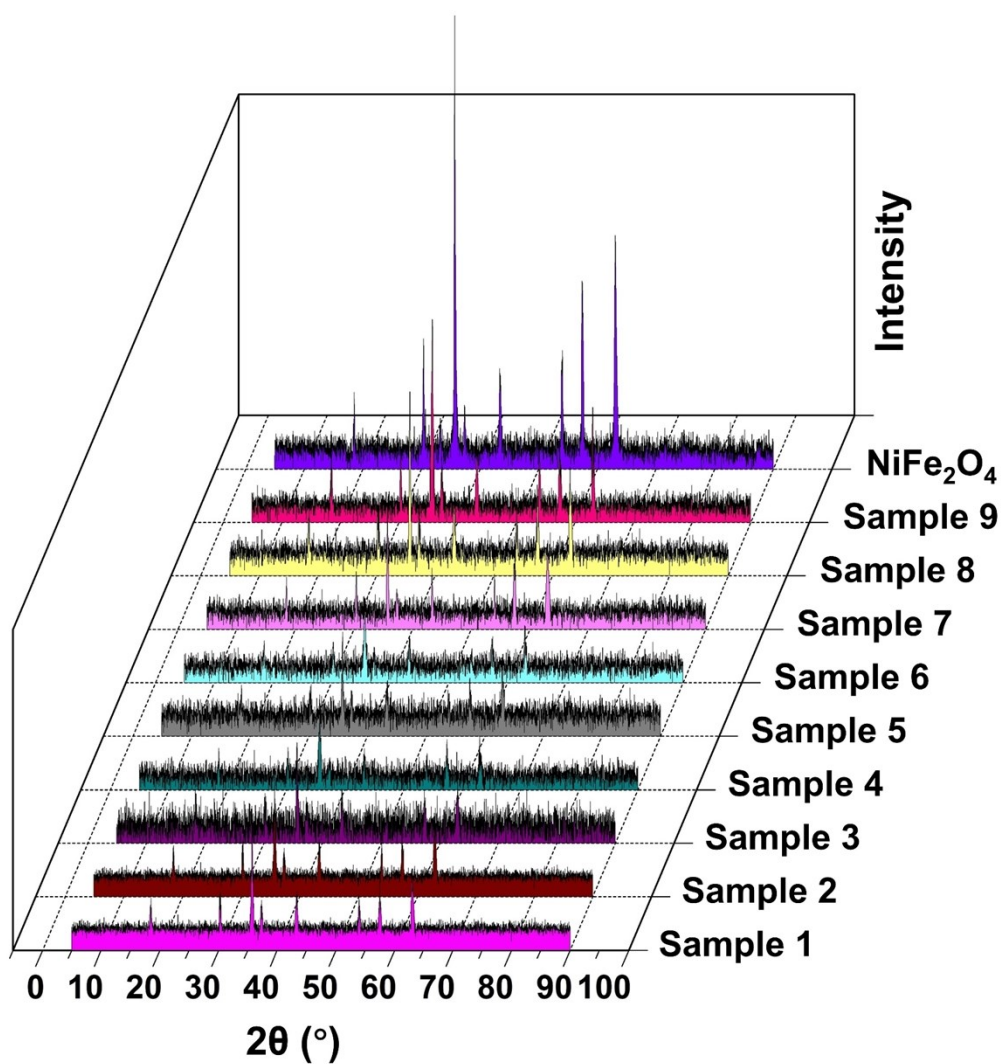

Figure S3. XRD for samples 1~9 and  $\text{NiFe}_2\text{O}_4$ .

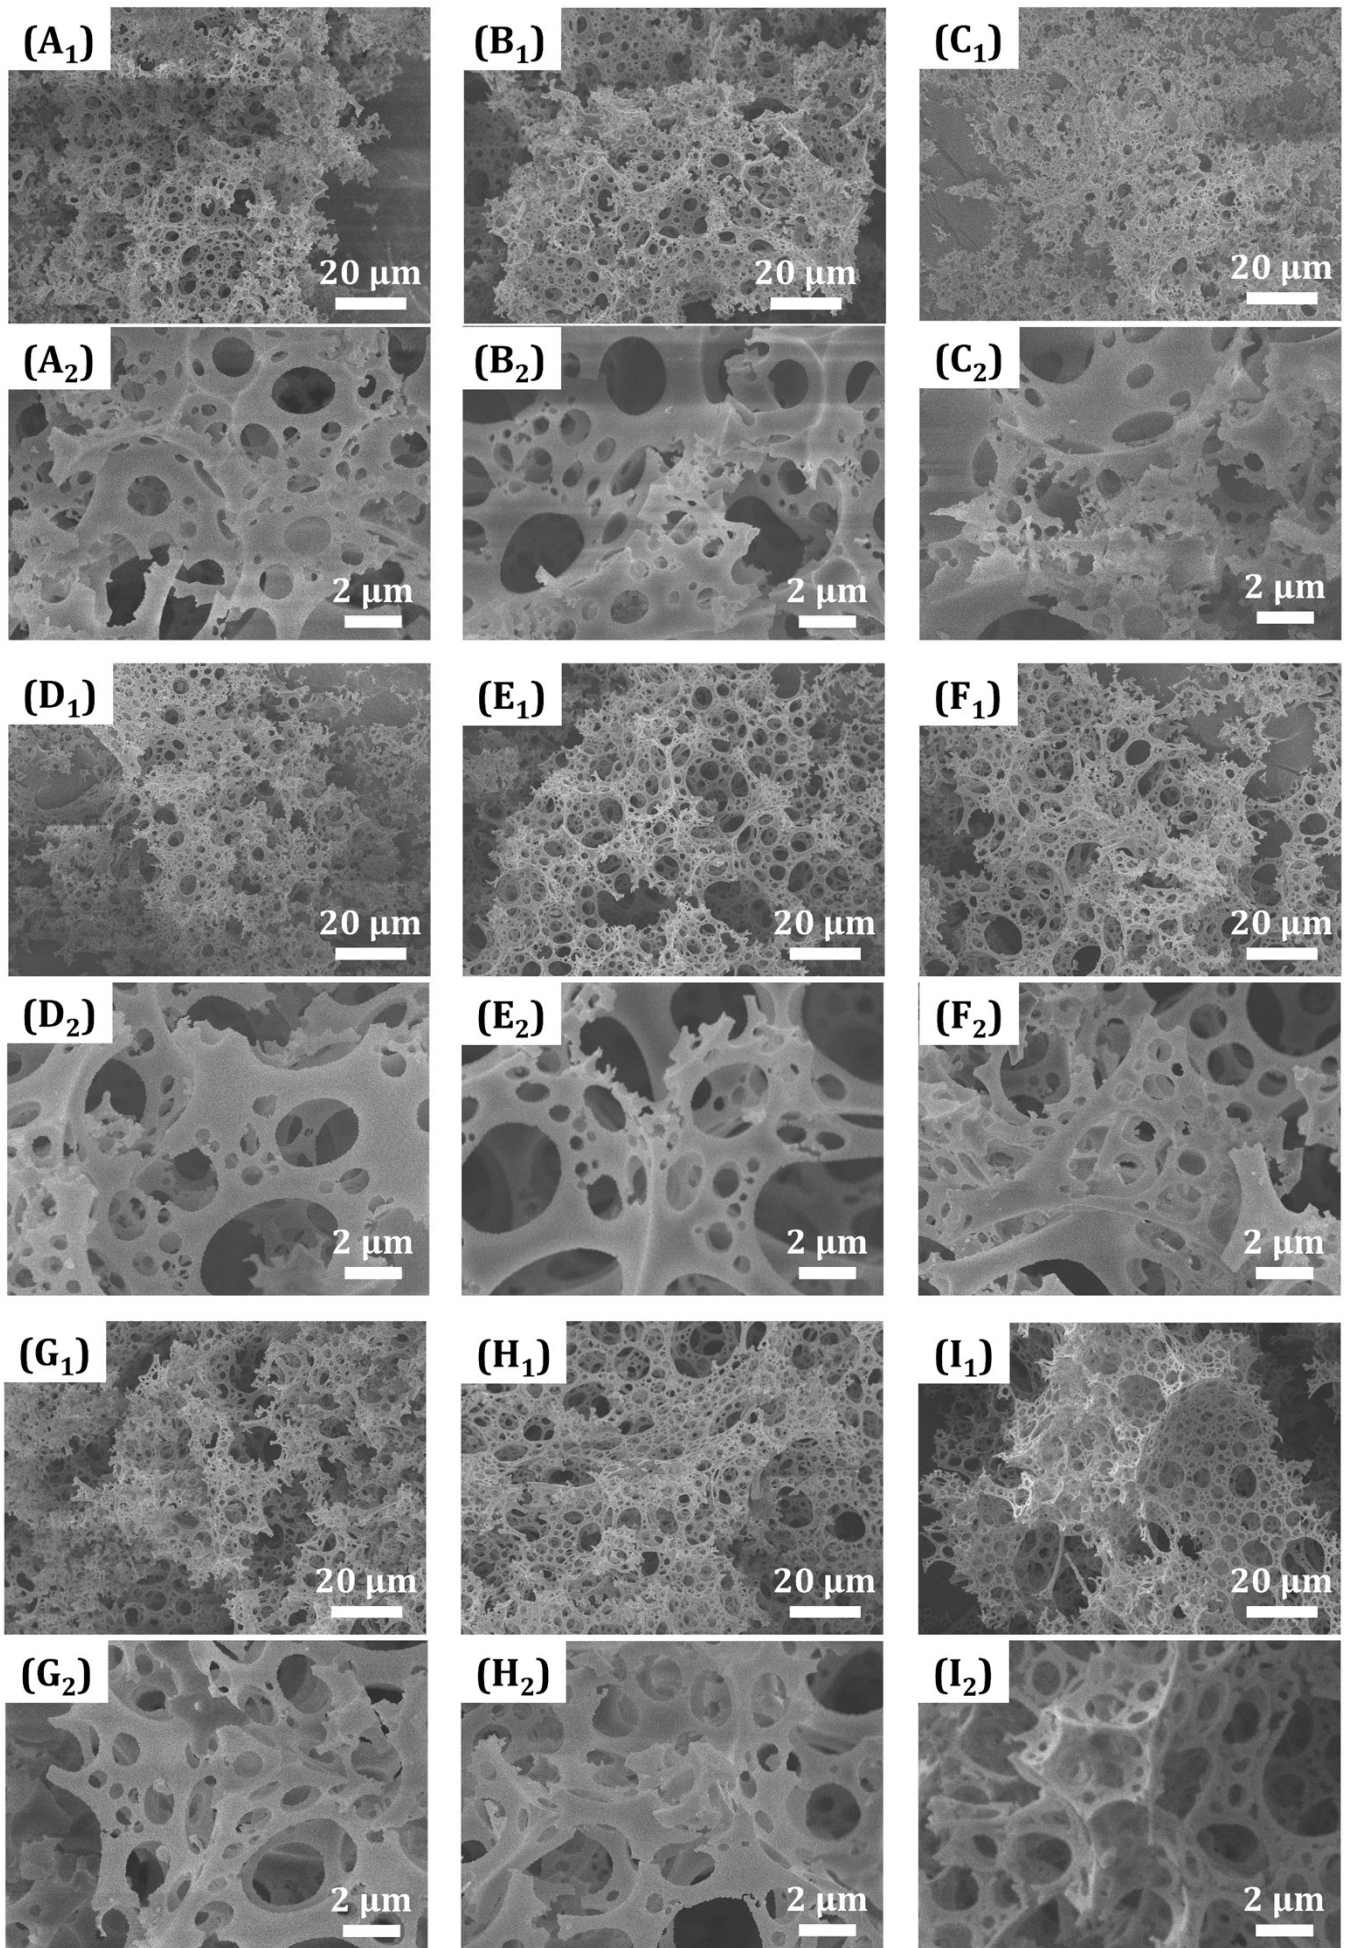

Figure S4. SEM images of all samples. (A~I, Samples 1~9.)
